# Supplementary figures and images for: The role of midbody-associated mRNAs in regulating abscission
Source: PubMed Central journal article supplement — J Cell Biol. 2023 Nov 3;222(12):e202306123. doi: 10.1083/jcb.202306123 (PMC10624257; doi:10.1083/jcb.202306123), 2023-11-03

|        |   |   |   |   |   |   |   |   |   |   |
|--------|---|---|---|---|---|---|---|---|---|---|
| Dox    | - | + | - | + | - | + | - | + | - | + |
| 5' UTR | - | - | - | - | + | + | - | - | + | + |
| 3' UTR | - | - | - | - | - | - | + | + | + | + |

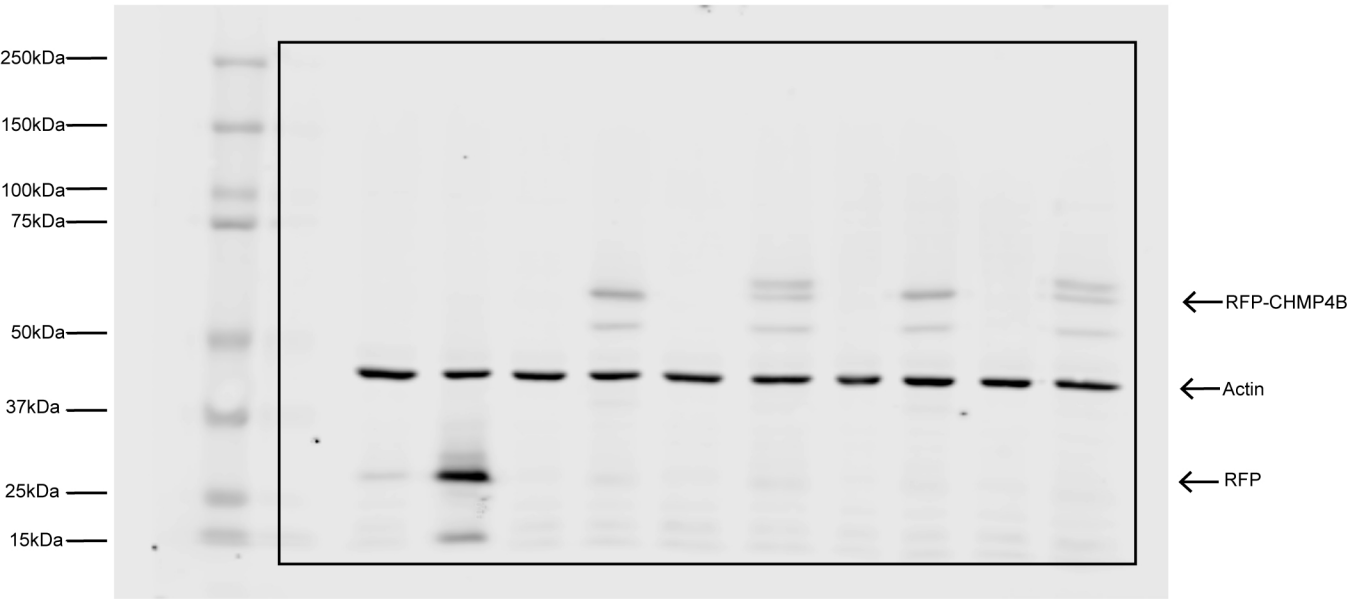

Supplement: JCB_202306123_SourceDataFS6.pdf [file JCB_202306123_SourceDataFS6.pdf]
